# Supplementary material for: Reduced graphene oxide layers full of bubbles for electromagnetic interference shielding
Source: Royal Society of Chemistry journal article supplement (doi:10.1039/d2tc04819a), 2023-01-01
Supplement: d2tc04819a1.pdf [file d2tc04819a1.pdf]

## Supporting Information

### Reduced Graphene Oxide Layers Full of Bubbles for Electromagnetic Interference Shielding

Sufang Yang,<sup>a, b</sup> Zechao Tao,<sup>\*a, c</sup> Xiangfen Li,<sup>a</sup> Jinxing Liu,<sup>a</sup> Qingqiang Kong,<sup>a</sup> Yelong Tong,<sup>d</sup>  
Junfen Li,<sup>a</sup> Zhanjun Liu,<sup>\*a, c, e</sup>

<sup>a</sup> CAS Key Laboratory of Carbon Materials, Institute of Coal Chemistry, Chinese Academy of Sciences, Taiyuan, 030001, China

<sup>b</sup> University of Chinese Academy of Sciences, Beijing, 100049, China

<sup>c</sup> Dalian National Laboratory for Clean Energy, Dalian, 116023, China

<sup>d</sup> China Academy of Space Technology, Beijing, 100049, China

<sup>e</sup> Center of Materials Science and Optoelectronics Engineering, University of Chinese Academy of Sciences, Beijing, 100049, China

\*Corresponding author. CAS Key Laboratory of Carbon Materials, Institute of Coal Chemistry, Chinese Academy of Sciences, Taiyuan, 030001, China

\*\* Corresponding author. CAS Key Laboratory of Carbon Materials, Institute of Coal Chemistry, Chinese Academy of Sciences, Taiyuan, 030001, China

E-mail addresses: taozechao05@sxicc.ac.cn (Z. Tao), zjliu03@sxicc.ac.cn (Z. Liu)

## Equations

### 1 Scherrer equation

$$L_c = \frac{K\lambda}{\beta_{002} \cos \theta_{002}} \quad (\text{S1})$$

Where K is sample shape constant (Cu-target, 0.154 nm),  $\lambda$  is X-ray source wavelength,  $\beta$  is full width at half maximum of the (002) peak, and  $\theta$  is the Bragg diffractive angle.

### 2 Cançadó equation

$$L_a = (2.4 \times 10^{-10}) \lambda_{\text{laser}}^4 \left(\frac{I_D}{I_G}\right)^{-1} \quad (\text{S2})$$

Where  $L_a$  is crystalline sizes, and  $\lambda_{\text{laser}}$  is wavelength (532 nm) of laser in Raman testing.

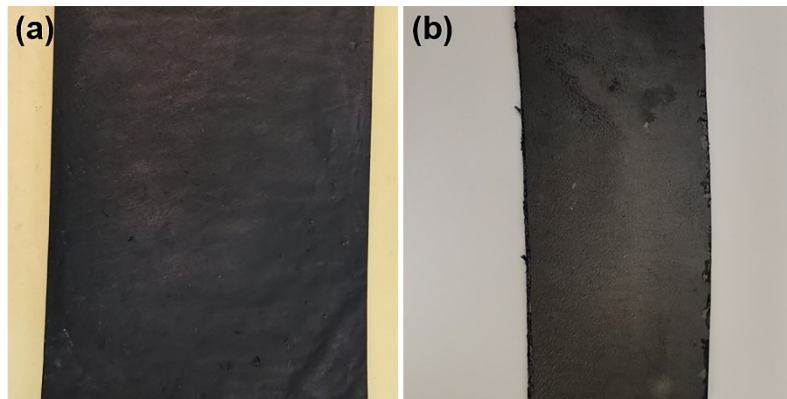

**Fig. S1.** Photograph of (a) GO-1VC, and (b) rGO-1VC-200.

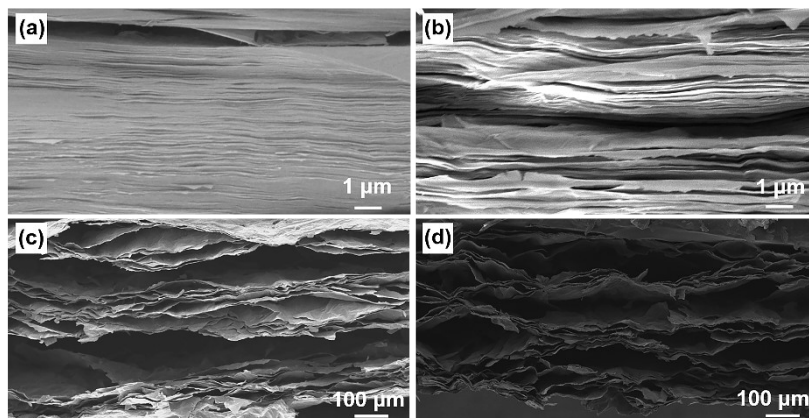

**Fig. S2.** SEM images of (a) GO, (b) rGO-90, (c) rGO-200, and (d) rGO-500 cross-sections.

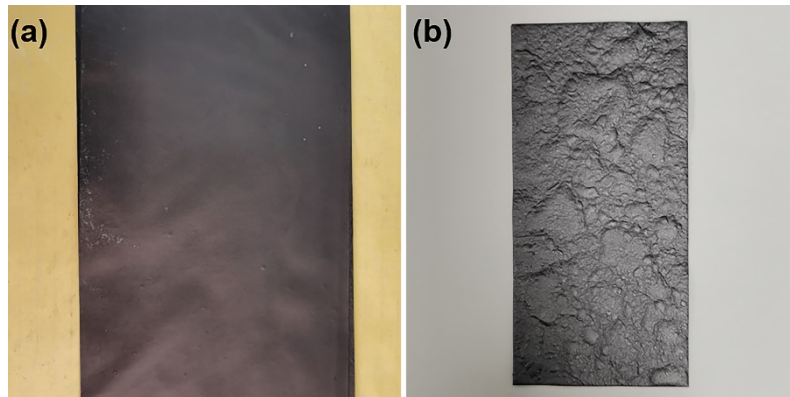

**Fig. S3.** Photograph of (a) GO and (b) rGO-200.

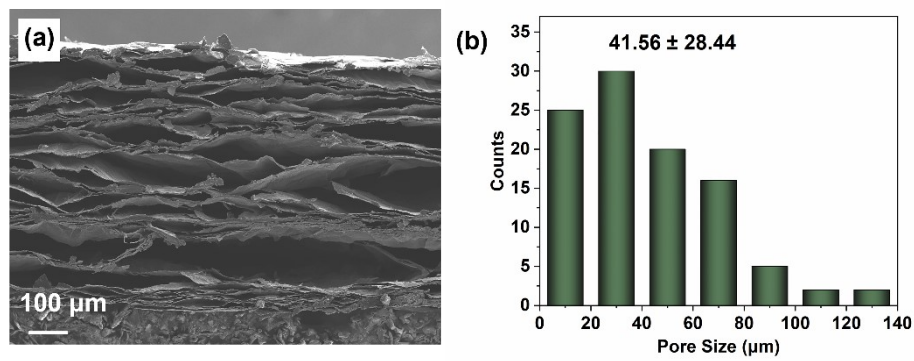

**Fig. S4.** (a) SEM image and (b) the pore size histograms of rGO-0.2VC-200.

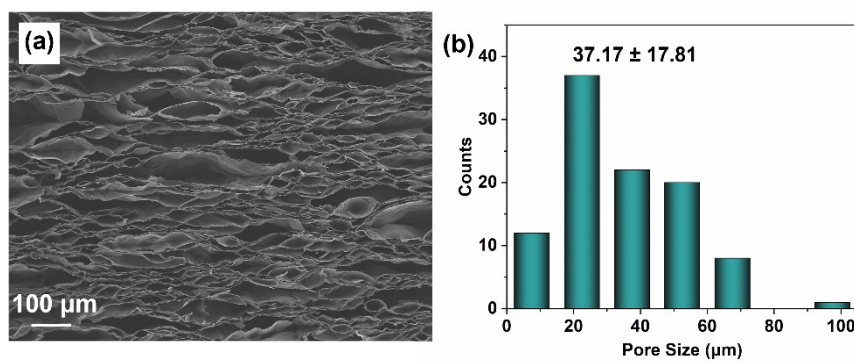

**Fig. S5.** (a) SEM image and (b) the pore size histograms of rGO-0.5VC-200.

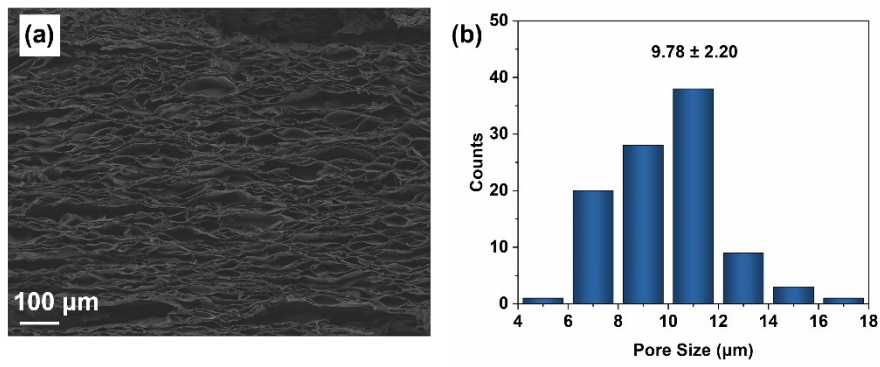

**Fig. S6.** (a) SEM image and (b) the pore size histograms of rGO-2VC-200.

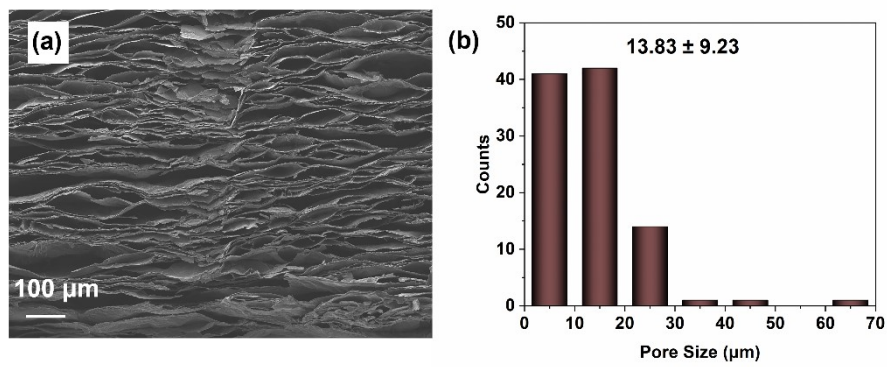

**Fig. S7.** (a) SEM image and (b) the pore size histograms of rGO-3VC-200.

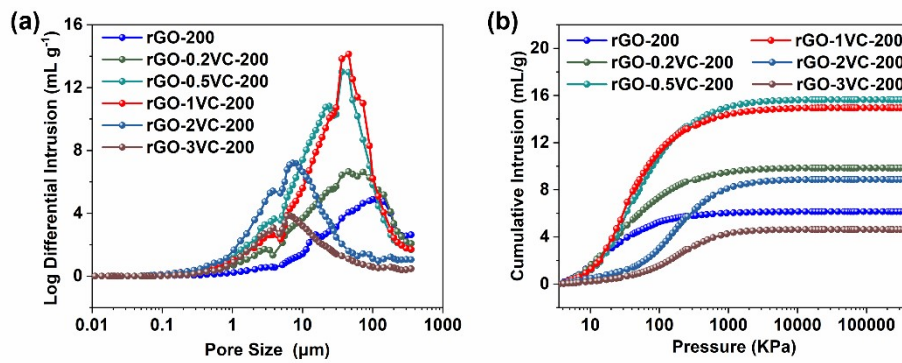

**Fig. S8.** (a) Pore diameter distribution curves and (b) mercury injection curves of rGO-xVC-200.

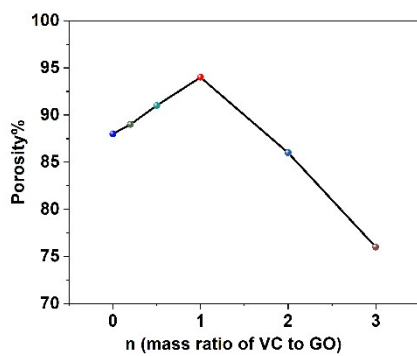

**Fig. S9.** Porosity of rGO-xVC-200.

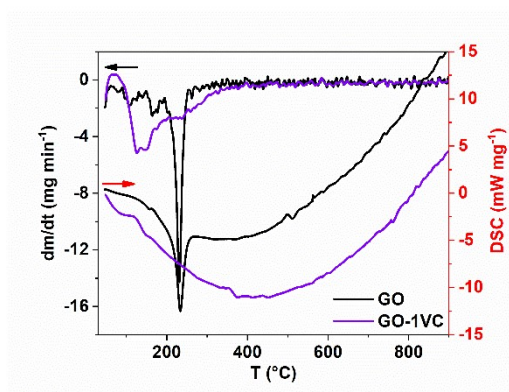

**Fig. S10.** The TG-DTG-DSC analysis of GO and GO-1VC.

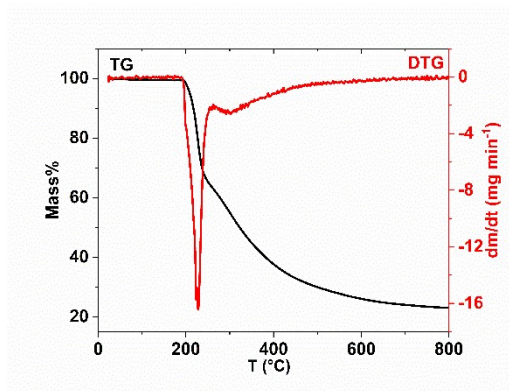

**Fig. S11.** The TG-DTG analysis of VC.

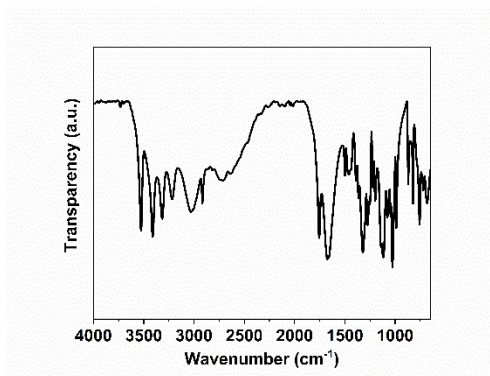

**Fig. S12.** The FT-IR of VC.

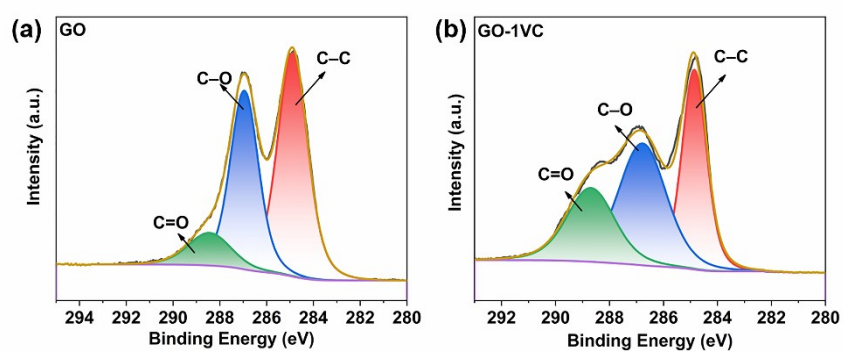

**Fig. S13.** C 1s XPS spectra of (a) GO and (b) rGO-1VC.

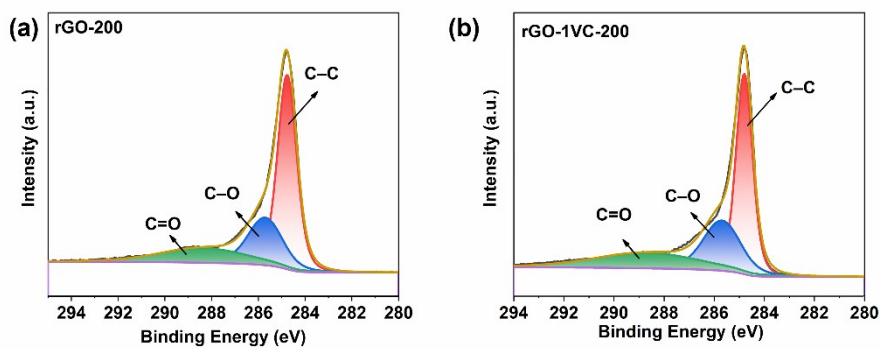

**Fig. S14.** C 1s XPS spectra of (a) rGO-200 and (b) rGO-1VC-200.

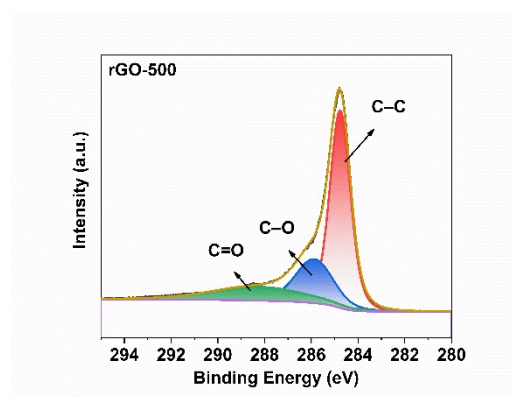

**Fig. S15.** C 1s XPS spectra of rGO-500.

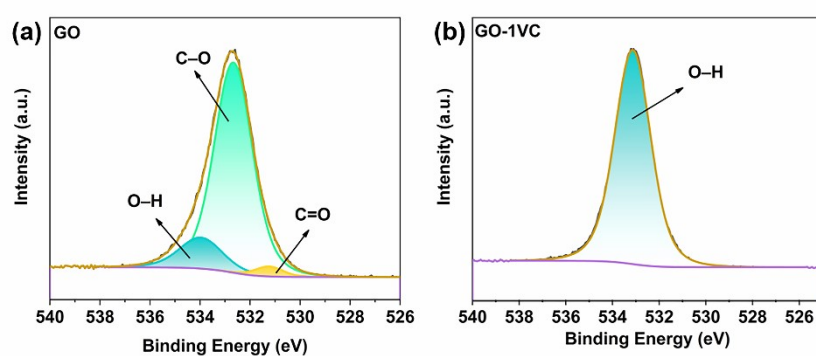

**Fig. S16.** O 1s XPS spectra of (a) GO and (b) GO-1VC.

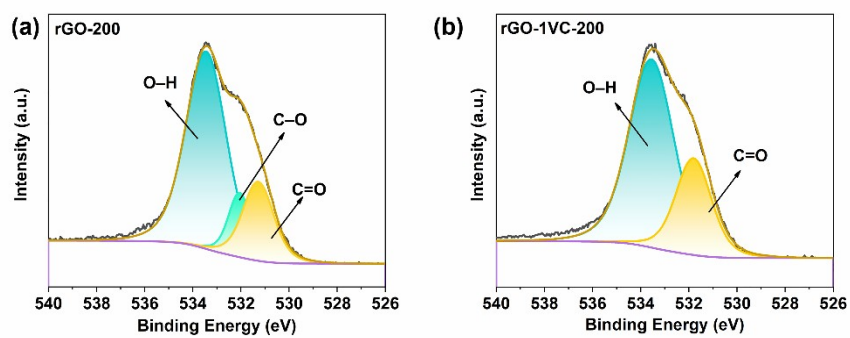

**Fig. S17.** O 1s XPS spectra of (a) rGO-200 and (b) rGO-1VC-200.

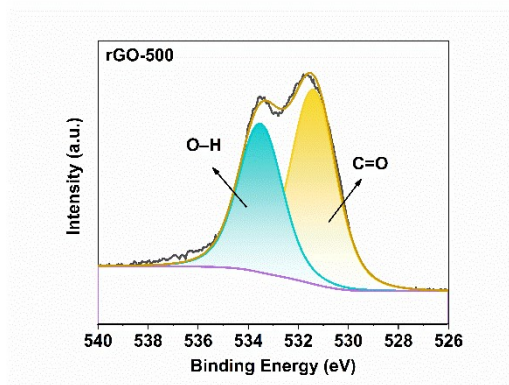

**Fig. S18.** O 1s XPS spectra of rGO-500.

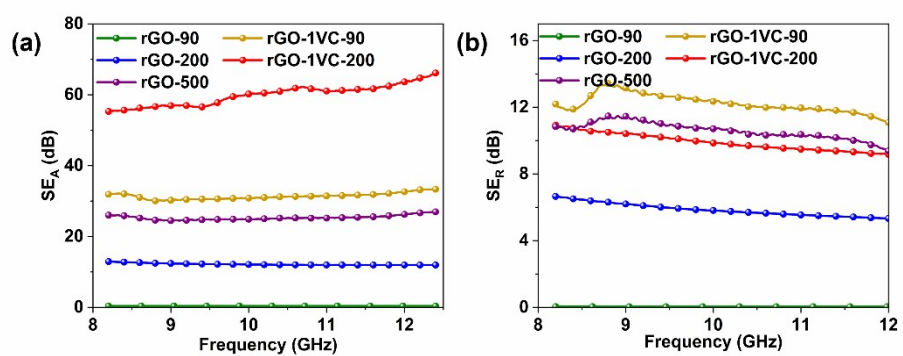

**Fig. S19.** (a)  $SE_A$  and (b)  $SE_R$  of rGO-90, rGO-200, rGO-500, rGO-1VC-90, and rGO-1VC-200.

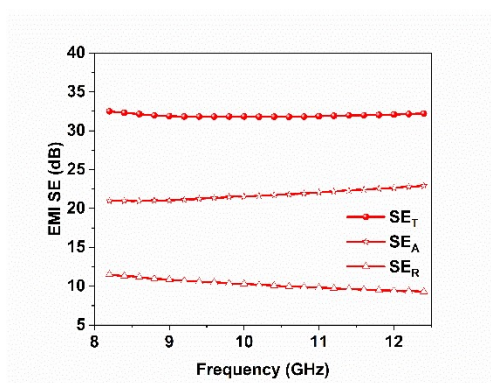

**Fig. S20.** The average SE values of rGO-1VC-200-C.



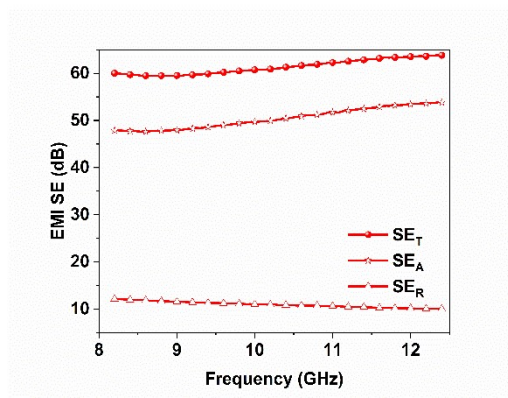

Fig. S21. The average SE values of rGO-1VC-200-P.

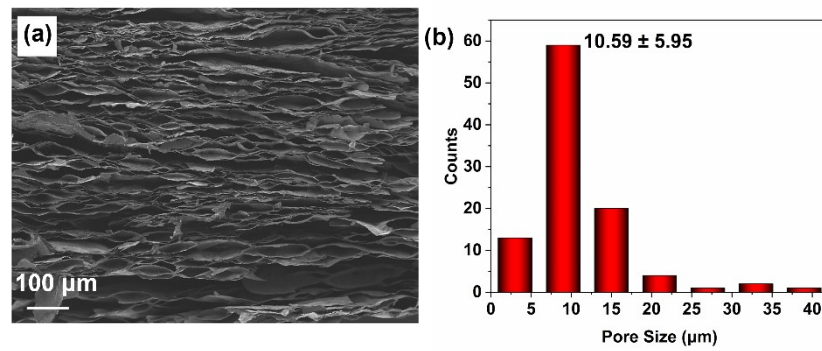

Fig. S22. (a-b) SEM image and the pore size histograms of rGO-1VC-200-P.

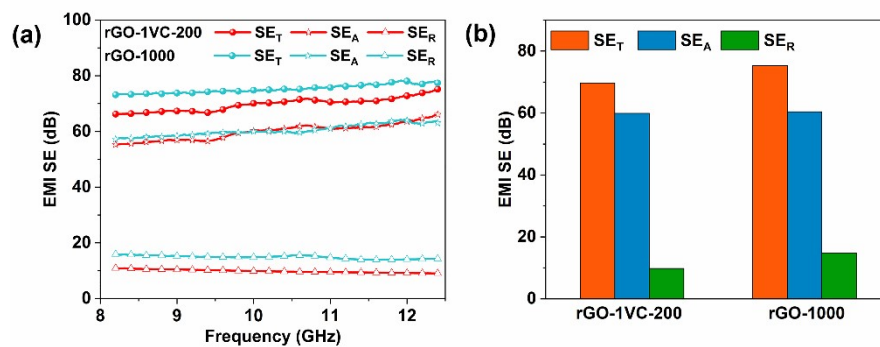

Fig. S23. The average SE values of rGO-1VC-200 and rGO-1000.

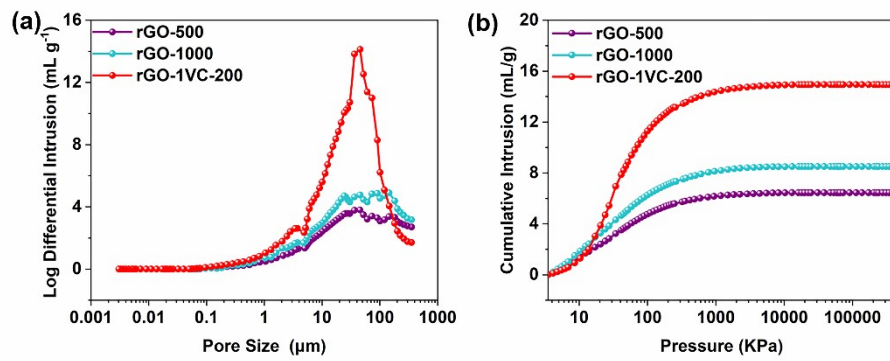

**Fig.S24.** (a) Pore diameter distribution curves and (b) mercury injection curves of rGO-500, rGO-1000 and rGO-1VC-200.

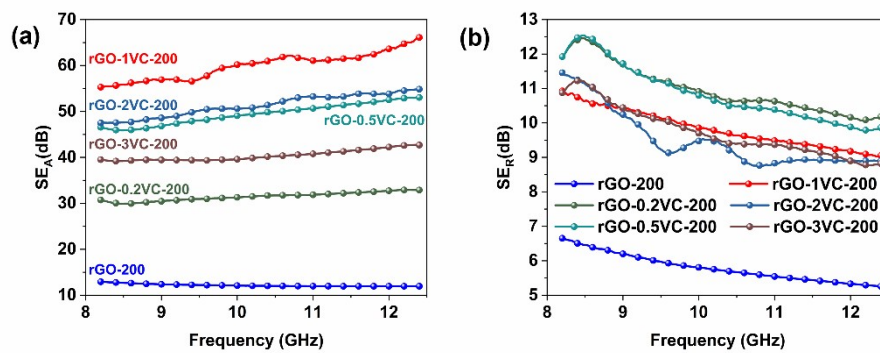

**Fig. S25.** (a)  $SE_A$  and (b)  $SE_R$  of rGO-xVC-200.

**Table S1** Thickness and bulk density of all samples

| Samples       | Thickness (mm) | Density (g cm <sup>-3</sup> ) |
|---------------|----------------|-------------------------------|
| GO            | 0.080          | 1.40                          |
| rGO-90        | 0.100          | 1.27                          |
| rGO-200       | 0.380          | 0.20                          |
| rGO-500       | 0.400          | 0.15                          |
| GO-1VC        | 0.141          | 0.73                          |
| rGO-1VC-90    | 0.212          | 0.51                          |
| rGO-1VC-200   | 1.346          | 0.06                          |
| rGO-0.2VC-200 | 0.432          | 0.14                          |
| rGO-0.5VC-200 | 1.025          | 0.08                          |
| rGO-2VC-200   | 1.109          | 0.13                          |
| rGO-3VC-200   | 0.901          | 0.12                          |

**Table S2** Structural values of Raman and XRD spectra.

| Samples     | 2 Theta (degree) | $d_{(002)}$ (Å) | FWHM (degree) | $L_c$ (nm) | $I_D/I_G$ | $L_a$ (nm) |
|-------------|------------------|-----------------|---------------|------------|-----------|------------|
| GO          | 13.74            | 6.44            | 0.61          | 134        | 1.42      | 13.54      |
| rGO-90      | 14.88            | 5.95            | 0.85          | 95         | 1.56      | 12.32      |
| rGO-200     | 20.64            | 4.30            | 2.82          | 29         | 1.80      | 10.68      |
| rGO-500     | 24.90            | 3.57            | 0.91          | 90         | 1.78      | 10.80      |
| GO-1VC      | 16.04            | 5.52            | 6.45          | 12         | 1.25      | 15.38      |
| rGO-1VC-90  | 24.87            | 3.58            | 9.02          | 9          | 1.49      | 12.90      |
| rGO-1VC-200 | 25.62            | 3.47            | 4.62          | 87         | 1.72      | 11.18      |

**Table S3** Elemental analysis of all samples

| Samples     | Element content (wt%) |       |      |      |       | C/O  |
|-------------|-----------------------|-------|------|------|-------|------|
|             | N                     | C     | H    | S    | O     |      |
| GO          | 0                     | 48.09 | 2.42 | 0.58 | 41.38 | 1.16 |
| rGO-90      | 0                     | 64.02 | 1.48 | 0.31 | 40.08 | 1.60 |
| rGO-200     | 0                     | 76.69 | 0.63 | 0.13 | 20.72 | 3.70 |
| rGO-500     | 0                     | 86.91 | 0.75 | 0    | 11.27 | 7.71 |
| GO-1VC      | 0                     | 46.01 | 3.41 | 0.17 | 43.78 | 1.05 |
| rGO-1VC-90  | 0                     | 44.90 | 3.17 | 0.23 | 29.02 | 1.55 |
| rGO-1VC-200 | 0                     | 73.41 | 1.61 | 0    | 15.10 | 4.86 |

**Table S4** The electrical conductivity and EMI SE of all samples.

| Samples       | Electrical conductivity (S cm <sup>-1</sup> ) | SE <sub>T</sub> (dB) | SE <sub>A</sub> (dB) | SE <sub>R</sub> (dB) | SE <sub>T</sub> /ρ (dB cm <sup>3</sup> g <sup>-1</sup> ) |
|---------------|-----------------------------------------------|----------------------|----------------------|----------------------|----------------------------------------------------------|
| GO            | -                                             | -                    | -                    | -                    | -                                                        |
| rGO-90        | 0.004                                         | 0.42                 | 0.39                 | 0.03                 | 0.34                                                     |
| rGO-200       | 6.02                                          | 18                   | 12                   | 6                    | 87                                                       |
| rGO-500       | 42.70                                         | 36                   | 26                   | 10                   | 237                                                      |
| GO-1VC        | 10.64                                         | -                    | -                    | -                    | -                                                        |
| rGO-1VC-90    | 22.47                                         | 13                   | 31                   | 12                   | 85                                                       |
| rGO-1VC-200   | 60.61                                         | 70                   | 60                   | 10                   | 1167                                                     |
| rGO-0.2VC-200 | 46.90                                         | 42                   | 31                   | 11                   | 300                                                      |
| rGO-0.5VC-200 | 52.66                                         | 60                   | 49                   | 11                   | 750                                                      |
| rGO-2VC-200   | 17.93                                         | 61                   | 51                   | 9                    | 469                                                      |
| rGO-3VC-200   | 17.02                                         | 50                   | 40                   | 10                   | 417                                                      |

**Table S5** EMI SE comparison of various shielding materials.

| Number | Samples                                                  | The preparation methods                          | EMI SE (dB) | Density (g cm <sup>-3</sup> ) | SE <sub>T</sub> /ρ (dB cm <sup>3</sup> g <sup>-1</sup> ) | Reference |
|--------|----------------------------------------------------------|--------------------------------------------------|-------------|-------------------------------|----------------------------------------------------------|-----------|
| 1      | rGO-1VC-200                                              | Chemical reduction without template (200 °C)     | 70          | 0.06                          | 1167                                                     | This work |
| 2      | MXene/RGO scaffolds                                      | 3D printing followed thermal annealing at 500 °C | 79          | 0.145                         | 483                                                      | 1         |
| 3      | Ti <sub>3</sub> C <sub>2</sub> T <sub>x</sub> MXene film | Thermal annealing at 500 °C                      | 57.8        | 2.57                          | 22.59                                                    | 2         |
| 4      | C <sub>60</sub> /CD complex                              | Thermal annealing at 360 °C                      | 53.52       | 1.914                         | 28                                                       | 3         |
| 5      | CNF mat                                                  | The wet papermaking method                       | 52-81       | 0.13-0.22                     | 370-470                                                  | 4         |
| 6      | Multilayered MWNTs                                       | Chemical vapor deposition (700 °C)               | 19.2        | 1.72                          | 32.98                                                    | 5         |
| 7      | CNT film                                                 | High temperature at 1000 °C and acid treatment   | 101.4       | 1.39                          | 72.9                                                     | 6         |
| 8      | graphene film                                            | HI reduction and annealing at 3000 °C            | 130         | 1.63                          | 79.75                                                    | 7         |

|    |                            |                                                                                     |           |        |              |    |
|----|----------------------------|-------------------------------------------------------------------------------------|-----------|--------|--------------|----|
| 9  | Graphene/carbon nanotubes  | HI reduction and annealing at 2800 °C                                               | 75        | 1.06   | 70.75        | 8  |
| 10 | CNF-PS foams               | Sacrificial template method                                                         | 20.51     | 0.62   | 33.1         | 9  |
| 11 | CH-rGO foam                | Freeze-drying strategy followed by hydrazine monohydrate vapor reduction            | 42        | 0.061  | 688.5        | 10 |
| 12 | CNT sponges                | Chemical vapor deposition and vacuum-assisted impregnation                          | 56        | 0.01   | 5480         | 11 |
| 13 | MPBC-18                    | Thermal annealing (800 °C) and impregnation                                         | 95.67     | 0.32   | 298.97       | 12 |
| 14 | Foamed Cu-Ni-CNT composite | Sacrificial template and electrophoretic deposition method                          | 54.6      | 0.23   | 237.4        | 13 |
| 15 | PIF-WS                     | One-pot liquid foaming process                                                      | 3.8       | 0.016  | 216-249      | 14 |
| 16 | SF-EP-CNT4                 | Wet-chemical deposition and foaming method                                          | 68.1      | 0.61   | 111.66       | 15 |
| 17 | MWCNT/Ag NWs/MWCNT film    | Vacuum-assisted filtration                                                          | 72.1      | 0.97   | 74.33        | 16 |
| 18 | PI/rGO foam                | In situ polymerization, nonsolvent induced phase separation and thermal imidization | 21        | 0.022  | 937          | 17 |
| 19 | 3D rGO-GNP                 | A facile foaming route (1500 °C)                                                    | 94        | 1.1    | 85.5         | 18 |
| 20 | PU/GO foam                 | Solution dip-coating and hydrazine monohydrate reduction                            | 19.9~57.7 | 0.030  | 663.3~1923.3 | 19 |
| 21 | CF/graphene aerogels       | Freeze drying and annealed at 1000 °C                                               | ~42.5     | 0.0028 | 16890        | 20 |
| 22 | TPU/RGO composite foams    | Foaming method                                                                      | 21.8      | ~0.7   | ~31.14       | 21 |

---

**Table S6** The EMI shielding performance of various shielding materials in a broad bandwidth.

| Number | samples                  | Thickness (mm) | Density (g cm <sup>-3</sup> ) | S-band (dB) | C-band (dB) | X-band (dB) | Ku-band (dB) | Reference |
|--------|--------------------------|----------------|-------------------------------|-------------|-------------|-------------|--------------|-----------|
| 1      | rGO-1VC-200              | 1.346          | 0.06                          | 54          | 63          | 70          | 73           | This work |
| 2      | SF-EP-CNT4               | 2              | 0.61                          | 77          | 73          | 68          | 72           | 15        |
| 3      | CF/graphene aerogels     | 2.83           | 0.0028                        | -           | -           | ~43         | ~45          | 20        |
| 4      | GR:1000                  | 5              | 0.006                         | -           | -           |             | 40           | 22        |
| 5      | GF@PDMS                  | 4.5            | 69.2                          | -           | -           |             | 36           | 23        |
| 6      | Graphene hybrid film     | 0.160          | -                             | -           | -           | 29          | 24           | 24        |
| 7      | rGO composites           | 2              | -                             | ~7          | ~10         | ~8          | ~7           | 25        |
| 8      | TPU/G film               | 0.050          | -                             | -           | ~15         | ~18         | ~20          | 26        |
| 9      | PMMA/CNT                 | 0.57           | -                             | -           | -           | ~14         | ~18          | 27        |
| 10     | Graphene foam            | 0.3            | 0.06                          | -           | -           | 25          | ~27          | 28        |
| 11     | NBR/GN                   | 6              | -                             | ~46         | ~50         | ~70         | -            | 29        |
| 12     | APD MXene-based aerogels | 2              | 18                            | -           | -           | 65          | 67           | 30        |
| 13     | C-MXene/SA-CNTfilms      | 0.009          | -                             | -           | -           | 60          | ~62          | 31        |
| 14     | MS-based hydrogels       | 2              | -                             | -           | -           | ~47         | ~57          | 32        |

## Reference

- 1 Y. Dai, X. Wu, L. Li, Y. Zhang, Z. Deng, Z.Z. Yu, H.B. Zhang, 3D printing of resilient, lightweight and conductive MXene/reduced graphene oxide architectures for broadband electromagnetic interference shielding, *J. Mater. Chem. A*, 2022, **10**, 11375-11385.
- 2 C. Xiang, R. Guo, S. Lin, S. Jiang, J. Lan, C. Wang, C. Cui, H. Xiao, Y. Zhang, Lightweight and ultrathin TiO<sub>2</sub>-Ti<sub>3</sub>C<sub>2</sub>TX/graphene film with electromagnetic interference shielding, *Chem. Eng. J.*, 2019, **360**, 1158-1166.

- 3 K. Qian, S. Li, J. Fang, Y. Yang, S. Cao, M. Miao, X. Feng, C<sub>60</sub> intercalating Ti<sub>3</sub>C<sub>2</sub>T MXenes assisted by  $\gamma$ -cyclodextrin for electromagnetic interference shielding films with high stability, *J. Mater. Sci. Technol.*, 2022, **127**, 71-77.
- 4 X. Hong, D.D.L. Chung, Carbon nanofiber mats for electromagnetic interference shielding, *Carbon*, 2017, **111**, 529-537.
- 5 D.W. Lee, H. Kim, J.H. Moon, J.H. Jeong, H.J. Sim, B.J. Kim, J.S. Hyeon, R.H. Baughman, S.J. Kim, Orthogonal pattern of spinnable multiwall carbon nanotubes for electromagnetic interference shielding effectiveness, *Carbon*, 2019, **152**, 33-39.
- 6 Y.J. Wan, X.Y. Wang, X.M. Li, S.Y. Liao, Z.Q. Lin, Y.G. Hu, T. Zhao, X.L. Zeng, C.H. Li, S.H. Yu, P.L. Zhu, R. Sun, C.P. Wong, Ultrathin Densified Carbon Nanotube Film with "Metal-like" Conductivity, Superior Mechanical Strength, and Ultrahigh Electromagnetic Interference Shielding Effectiveness, *ACS Nano*, 2020, **14**, 14134-14145.
- 7 E. Zhou, J. Xi, Y. Liu, Z. Xu, Y. Guo, L. Peng, W. Gao, J. Ying, Z. Chen, C. Gao, Large-area potassium-doped highly conductive graphene films for electromagnetic interference shielding, *Nanoscale*, 2017, **9**, 18613-18618.
- 8 H. Jia, Q.Q. Kong, X. Yang, L.J. Xie, G.H. Sun, L.L. Liang, J.P. Chen, D. Liu, Q.G. Guo, C.M. Chen, Dual-functional graphene/carbon nanotubes thick film: Bidirectional thermal dissipation and electromagnetic shielding, *Carbon*, 2021, **171**, 329-340.
- 9 Y. Yang, M.C. Gupta, K.L. Dudley, R.W. Lawrence, Novel carbon nanotube-polystyrene foam composites for electromagnetic interference shielding, *Nano Lett.*, 2005, **5**, 2131-4.

- 10 Y. Yuan, L. Liu, M. Yang, T. Zhang, F. Xu, Z. Lin, Y. Ding, C. Wang, J. Li, W. Yin, Q. Peng, X. He, Y. Li, Lightweight, thermally insulating and stiff carbon honeycomb-induced graphene composite foams with a horizontal laminated structure for electromagnetic interference shielding, *Carbon*, 2017, **123**, 223-232.
- 11 D. Lu, Z. Mo, B. Liang, L. Yang, Z. He, H. Zhu, Z. Tang, X. Gui, Flexible, lightweight carbon nanotube sponges and composites for high-performance electromagnetic interference shielding, *Carbon*, 2018, **133**, 457-463.
- 12 G. Wang, D. Lai, X. Xu, Y. Wang, Lightweight, stiff and Heat-Resistant Bamboo-Derived carbon scaffolds with gradient aligned microchannels for highly efficient EMI shielding, *Chem. Eng. J.*, 2022, **446**, 136911.
- 13 K. Ji, H. Zhao, J. Zhang, J. Chen, Z. Dai, Fabrication and electromagnetic interference shielding performance of open-cell foam of a Cu–Ni alloy integrated with CNTs, *Appl. Surf. Sci.*, 2014, **311**, 351-356.
- 14 J. Ma, K. Wang, M. Zhan, A comparative study of structure and electromagnetic interference shielding performance for silver nanostructure hybrid polyimide foams, *RSC Adv.*, 2015, **5**, 65283-65296.
- 15 Y. Xu, Y. Li, W. Hua, A. Zhang, J. Bao, Light-Weight Silver Plating Foam and Carbon Nanotube Hybridized Epoxy Composite Foams with Exceptional Conductivity and Electromagnetic Shielding Property, *ACS Appl. Mater. Interfaces*, 2016, **8**, 24131-24142.
- 16 Z. Wang, Q.Q. Kong, Z.L. Yi, L.J. Xie, H. Jia, J.P. Chen, D. Liu, D. Jiang, C.M. Chen, Electromagnetic interference shielding material for super-broadband: multi-



walled carbon nanotube/silver nanowire film with an ultrathin sandwich structure, *J. Mater. Chem. A*, 2021, **9**, 25999-26009.

17 Y. Li, X. Pei, B. Shen, W. Zhai, L. Zhang, W. Zheng, Polyimide/graphene composite foam sheets with ultrahigh thermostability for electromagnetic interference shielding, *RSC Adv.*, 2015, **5**, 24342-24351.

18 J. Li, X. Zhao, W. Wu, X. Ji, Y. Lu, L. Zhang, Bubble-templated rGO-graphene nanoplatelet foams encapsulated in silicon rubber for electromagnetic interference shielding and high thermal conductivity, *Chem. Eng. J.*, 2021, **415**, 129054.

19 B. Shen, Y. Li, W. Zhai, W. Zheng, Compressible Graphene-Coated Polymer Foams with Ultralow Density for Adjustable Electromagnetic Interference (EMI) Shielding, *ACS Appl. Mater. Interfaces*, 2016, **8**, 8050-8057.

20 Y.J. Wan, P.L. Zhu, S.H. Yu, R. Sun, C.P. Wong, W.H. Liao, Ultralight, super-elastic and volume-preserving cellulose fiber/graphene aerogel for high-performance electromagnetic interference shielding, *Carbon*, 2017, **115**, 629-639.

21 Q. Jiang, X. Liao, J. Li, J. Chen, J. Yi, Q. Yang, G. Li, Flexible thermoplastic polyurethane/reduced graphene oxide composite foams for electromagnetic interference shielding with high absorption characteristic, *Composites Part A*, 2019, **123**, 310-319.

22 M. González, J. Baselga, J. Pozuelo, Modulating the electromagnetic shielding mechanisms by thermal treatment of high porosity graphene aerogels, *Carbon*, 2019 **147**, 27-34.

23 H. Li, L. Jing, Z.L. Ngoh, R.Y. Tay, J. Lin, H. Wang, S.H. Tsang, E.H.T. Teo,

Engineering of High-Density Thin-Layer Graphite Foam-Based Composite Architectures with Superior Compressibility and Excellent Electromagnetic Interference Shielding Performance, *ACS Appl. Mater. Interfaces*, 2018, **10**, 41707-41716.

24 L. Ma, Z. Lu, J. Tan, J. Liu, X. Ding, N. Black, T. Li, J. Gallop, L. Hao, Transparent Conducting Graphene Hybrid Films To Improve Electromagnetic Interference (EMI) Shielding Performance of Graphene, *ACS Appl. Mater. Interfaces*, 2017, **9**, 34221-34229.

25 B. Wen, X.X. Wang, W.Q. Cao, H.L. Shi, M.M. Lu, G. Wang, H.B. Jin, W.Z. Wang, J. Yuan, M.S. Cao, Reduced graphene oxides: the thinnest and most lightweight materials with highly efficient microwave attenuation performances of the carbon world, *Nanoscale*, 2014, **6**, 5754-61.

26 B. Shen, Y. Li, D. Yi, W. Zhai, X. Wei, W. Zheng, Strong flexible polymer/graphene composite films with 3D saw-tooth folding for enhanced and tunable electromagnetic shielding, *Carbon*, 2017, **113**, 55-62.

27 K. Hayashida, Y. Matsuoka, Electromagnetic interference shielding properties of polymer-grafted carbon nanotube composites with high electrical resistance, *Carbon*, 2015, **85**, 363-371.

28 B. Shen, Y. Li, D. Yi, W. Zhai, X. Wei, W. Zheng, Microcellular graphene foam for improved broadband electromagnetic interference shielding, *Carbon*, 2016, **102**, 154-160.

29 A.A. Al-Ghamdi, A.A. Al-Ghamdi, Y. Al-Turki, F. Yakuphanoglu, F. El-Tantawy,

Electromagnetic shielding properties of graphene/acrylonitrile butadiene rubber nanocomposites for portable and flexible electronic devices, *Composites, Part B*, 2016, **88**, 212-219.

30 N. Wu, Y. Yang, C. Wang, Q. Wu, F. Pan, R. Zhang, J. Liu, Z. Zeng, Ultrathin Cellulose Nanofiber Assisted Ambient-Pressure-Dried, Ultralight, Mechanically Robust, Multifunctional MXene Aerogels, *Adv. Mater.*, 2022, e2207969.

31 B. Li, Y. Yang, N. Wu, S. Zhao, H. Jin, G. Wang, X. Li, W. Liu, J. Liu, Z. Zeng, Bicontinuous, High-Strength, and Multifunctional Chemical-Cross-Linked MXene/Superaligned Carbon Nanotube Film, *ACS Nano*, 2022, **16**, 19293-19304.

32 Y. Yang, N. Wu, B. Li, W. Liu, F. Pan, Z. Zeng, J. Liu, Biomimetic Porous MXene Sediment-Based Hydrogel for High-Performance and Multifunctional Electromagnetic Interference Shielding, *ACS Nano*, 2022, **16**, 15042-15052.
